# Supplementary material for: Mechanistic Target of Rapamycin Complex 1 Signaling Modulates Vascular Endothelial Function Through Reactive Oxygen Species
Source: PubMed Central journal article supplement — J Am Heart Assoc. 2019 Apr 25;8(9):e010662. doi: 10.1161/JAHA.118.010662 (PMC6512105; doi:10.1161/jaha.118.010662), 2019-04-25
Supplement: JAH3-8-e010662-s001.pdf [file JAH3-8-e010662-s001.pdf]

# **Supplemental Material**

Table S1. qPCR primer sequences.

**qPCR primer sequences**

| <b>Gene</b>    | <b>Forward primer 5'-3'</b>         | <b>Reverse primer 5'-3'</b>     |
|----------------|-------------------------------------|---------------------------------|
| <b>β-actin</b> | <b>CATCCTCTTCCTCCCTGGAGAAGA</b>     | <b>ACAGGATTCCATACCCAAGAAGGA</b> |
| <b>NOX1</b>    | <b>CATAAGGGGAGTTGCAGGCA</b>         | <b>AATCACGACCTTCTGCTGGG</b>     |
| <b>NOX2</b>    | <b>ACCTCCTCTTCCCAGATCC</b>          | <b>ACCCTAGCCTGCTTATGGGA</b>     |
| <b>NOX4</b>    | <b>TAGGCTCCAGGCAAACACTG</b>         | <b>TTAGGAACACTGCAGCGAGG</b>     |
| <b>SOD1</b>    | <b>CAAGCGGTGAACCAGTTGTG</b>         | <b>CAGTCACATTGCCAGGTCT</b>      |
| <b>SOD2</b>    | <b>ACCGAGGAGAAGTACCACGA</b>         | <b>GCCTCCAGCAACTCTCCTTT</b>     |
| <b>CAT</b>     | <b>TTATTCCTGTGCTGTGCGGT</b>         | <b>GCAACCAAACACGGTCCTTC</b>     |
| <b>IL-1β</b>   | <b>CAACCAACAAGTGATATTCTCCATG</b>    | <b>GATCCACACTCTCCAGCTGCA</b>    |
| <b>IL-10</b>   | <b>TGAGGCGCTGTCGTCATCGATTTCTCCC</b> | <b>ACCTGCTCCACTGCCTTGCT</b>     |

Primer sequences used for qPCR experiments in this study.

**Table S2. Aortic ring EC<sub>50</sub> and E<sub>max</sub> values.**

| <b>ACh</b>           | <b>CONTROL</b> | <b>LEUCINE</b>  | <b>LEUCINE<br/>+S6KDN</b>   |
|----------------------|----------------|-----------------|-----------------------------|
| -logEC <sub>50</sub> | 7.2 ± 0.1      | 6.7 ± 0.1*      | 7.0 ± 0.2                   |
| E <sub>max</sub>     | 74.2 ± 4.3     | 63.9 ± 5.3      | 67.9 ± 2.3                  |
| <b>ACh</b>           | <b>Ad-GFP</b>  | <b>Ad-S6KCA</b> | <b>Ad-S6KCA<br/>+Tempol</b> |
| -logEC <sub>50</sub> | 7.6 ± 0.1      | 6.4 ± 0.3*      | 6.9 ± 0.1†                  |
| E <sub>max</sub>     | 77.9 ± 2.4     | 70.2 ± 3.5      | 74.6 ± 2.0                  |

Calculated EC<sub>50</sub> and E<sub>max</sub> values for leucine stimulated and Ad-S6KCA infected aortic rings. \*p<0.05 vs control; †p<0.05 vs Ad-S6KCA.

**Figure S1. Valine does not activate mTORC1 signaling in aortic rings ex vivo.**

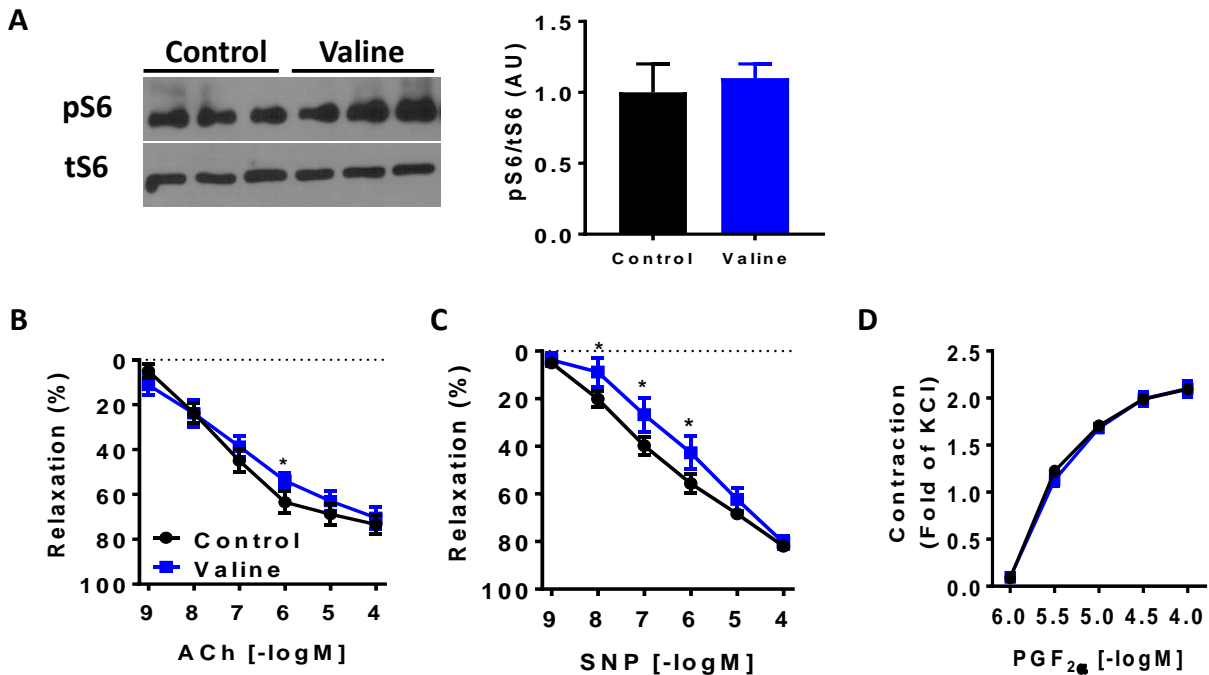

**(A)** Representative western blot images of phospho- and total S6 expression and quantification data (expressed as arbitrary units) of aortic rings cultured in control (0.45mM) or valine-supplemented (10mM) media. Vascular reactivity responses of aortic rings to **(B)** endothelial-dependent acetylcholine, **(C)** endothelial-independent sodium nitroprusside, and contractile responses to **(D)** prostaglandin F<sub>2α</sub> (n=10/group). Of note, the control group is reproduced from Figures 1C-E. \*p<0.05 vs control.

Figure S2. mTOR physically interacts with the p65 subunit of the NF $\kappa$ B transcriptional complex.

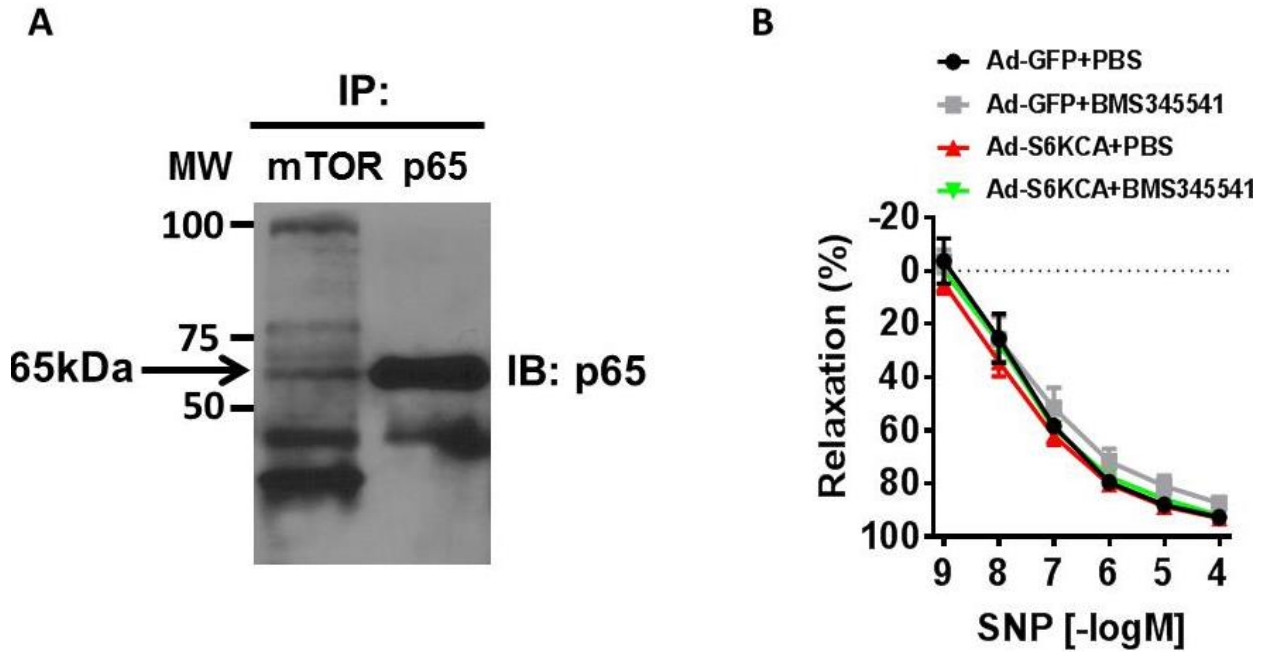

(A) Representative western blot image of MLECs immuno-precipitated with antibodies for mTOR and p65 subunit of the NF $\kappa$ B transcriptional complex. (B) Vascular reactivity responses of adenoviral infected aortic rings treated with BMS-345541 (300nM) or vehicle (PBS) for 16hrs to endothelial-independent sodium nitroprusside (n=5/group).
